# Supplementary material for: Shaking hands is a homeodomain transcription factor that controls axon outgrowth of central complex neurons in the insect model Tribolium
Source: Oxford University Press journal article supplement (doi:10.1242/dev.199368), 2021-08-20
Supplement: dev199368supp.pdf [file dev199368supp.pdf]

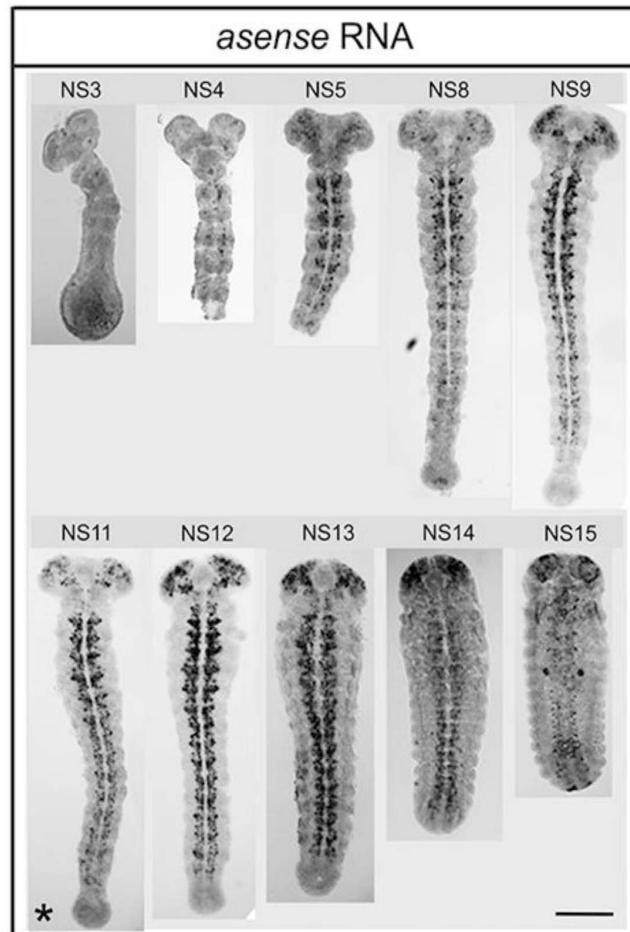

**Fig. S1. Embryonic development of *Tribolium*;** dorsal view of whole-mount embryos. Neuroblasts (NBs) are visualized by asense RNA in situ hybridization. *Tribolium* embryogenesis is subdivided into 15 stages from NS1 (0% embryogenesis) to NS15 (100% embryogenesis). NB formation in the brain begins at stage NS4. Subsequently, the number of NBs increases steadily until stage NS13/NS14. The precise number of brain NBs that are generated during embryogenesis is not known, but it is estimated to be around 100 NBs per lobe. G10011-GFP-positive cells are first observed at approximately 60% of embryonic development (stage NS11; marked by an asterisk). Scale bar: 200  $\mu$ m.

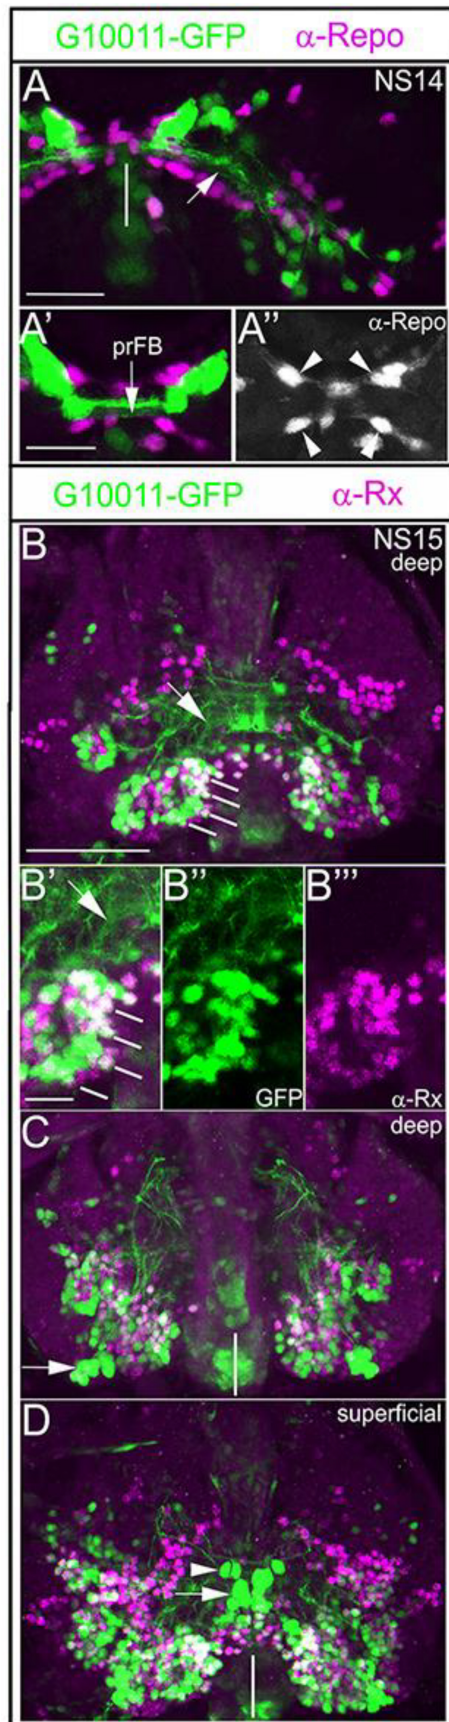

**Fig. S2. Embryonic G10011-GFP-positive neurons establish the FB primordium (prFB).**

(A-A'') Double-immuno-staining with  $\alpha$ -GFP (green) and  $\alpha$ -Repo antibody (magenta). Cell membranes of midline-associated glia (arrowheads in A'') form a channel through which the DM1-DM4 progeny project their trajectories which constitute the prFB (arrows in A and A'; white line in A marks the midline). (B-D) Double-immuno-staining with  $\alpha$ -GFP (green) and  $\alpha$ -Rx antibody (magenta). (B) The prFB (arrow) is established by the progeny of four neuroblasts [in *Drosophila* called DM1-DM4; white lines (Andrade et al., 2019)]. (B'-B'') Many prFB neurons have been shown to express Rx protein (Farnworth et al.; 2020). A subset of Rx-positive neurons co-expresses G10011-GFP. Arrow in B' indicates the trajectories of the progeny of DM1-DM4. (C) We interpret a group of posterolaterally located cells as AOTU neurons (arrow). (D) We interpret a cluster of very large G10011-GFP-positive cells near the midline (white line) as neurosecretory cells of the prospective PI (arrow). A small cluster of prominent cells is labelled with an arrowhead. In *Drosophila* neurons in this position and with similar morphology and axon trajectories express the neuropeptide HUGIN. Scale bars: (A-A'') 20  $\mu$ m; (B'-B'') 10  $\mu$ m; (B,C,D) 50  $\mu$ m.

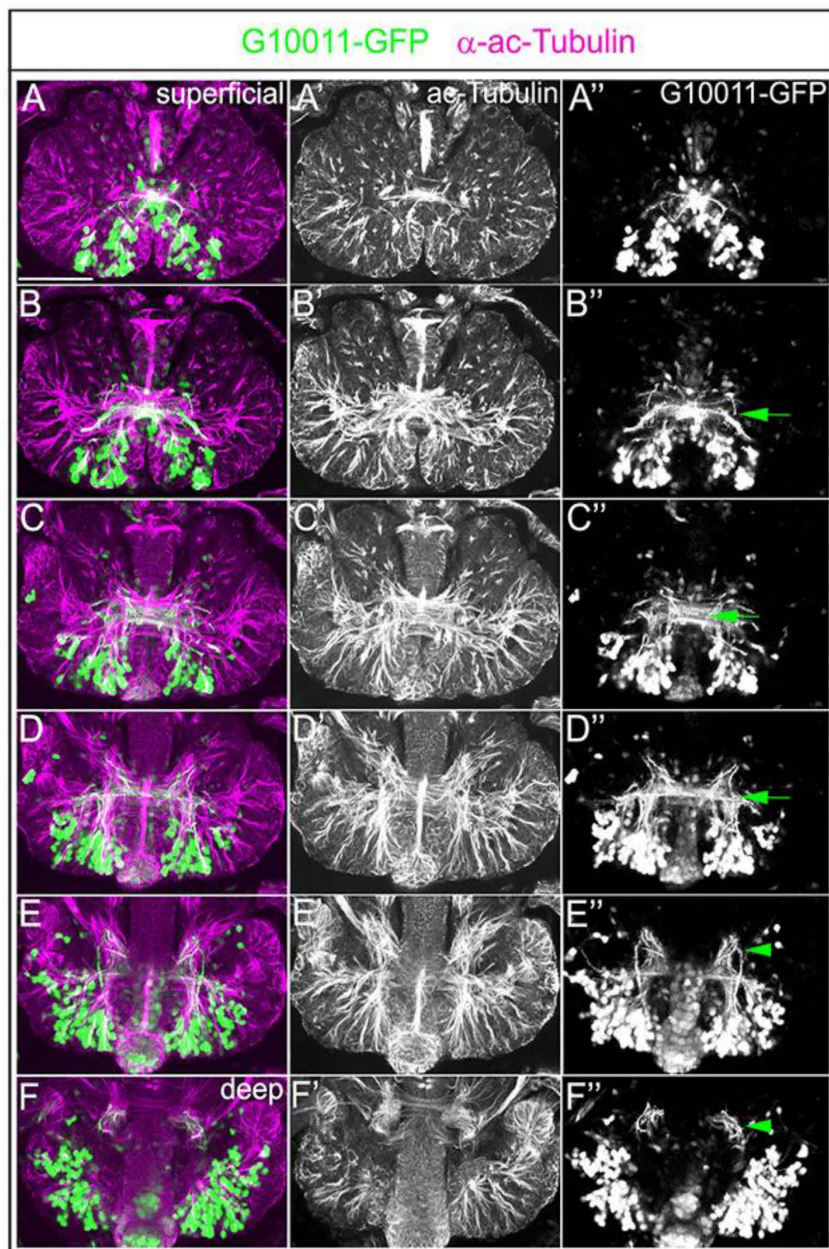

**Fig. S3. G10011-GFP positive fascicles contribute to several major axon tracts in the embryonic brain.** (A-F) G10011 brain at late stage NS15 stained with  $\alpha$ -GFP (green) and  $\alpha$ -acetylated Tubulin (magenta). Serial confocal sections were combined and visualized as maximum intensity projections to display individual anatomical features. (A'-F') acetylated Tubulin only. (A''-F'') GFP only. (B''-D'') GFP-positive axon trajectories make multiple contributions to the commissural system (arrows). (E'',F'') GFP-positive fibres contribute to longitudinal axon tracts which extend towards the VNC (arrowheads). Scale bar: (A-F'') 50  $\mu$ m.



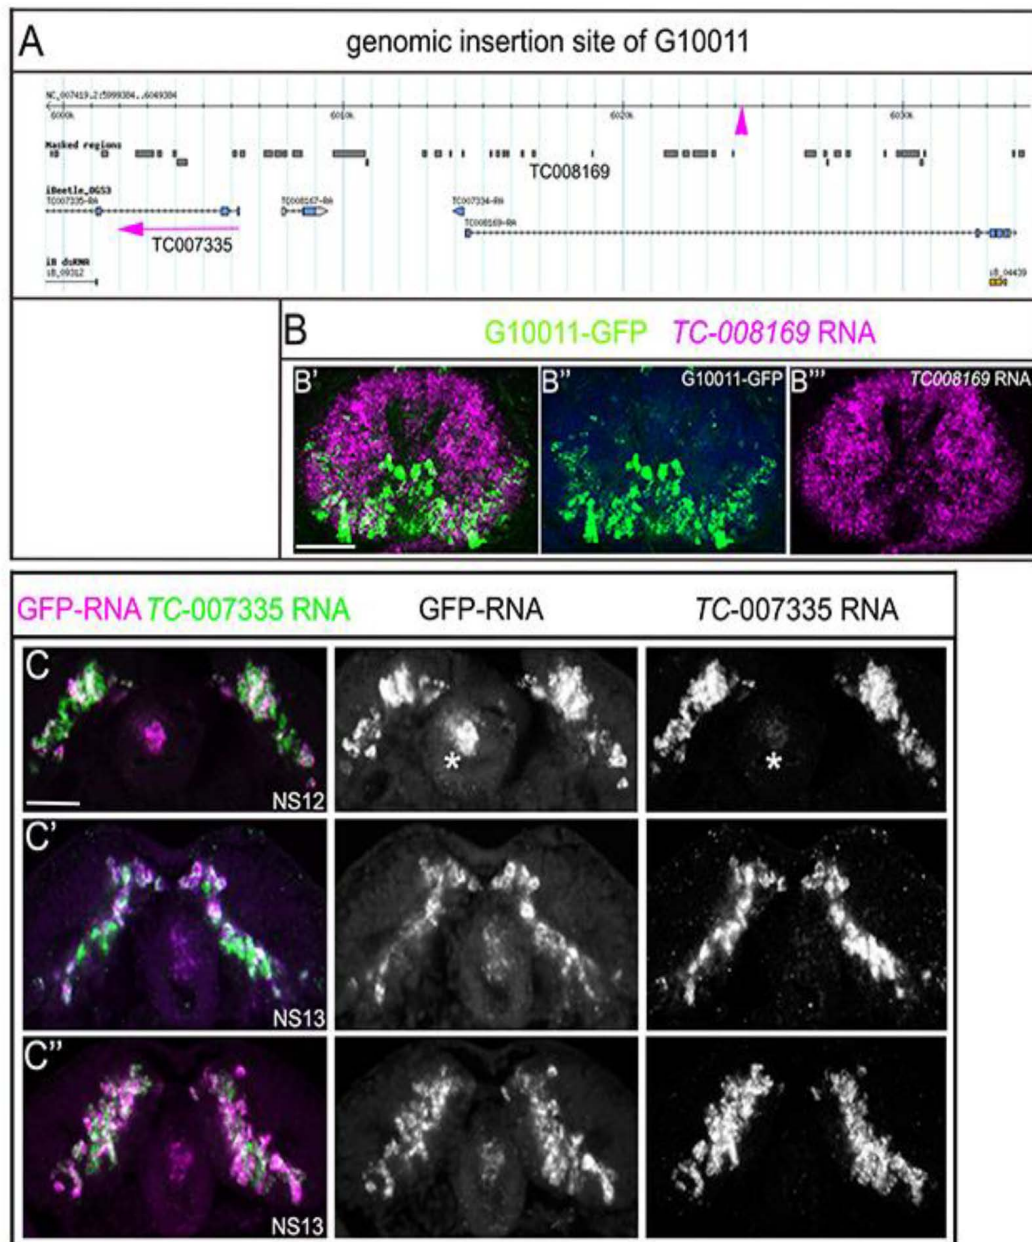

**Fig. S4. Identification of the G10011 associated gene.** Top panel: (A) Genomic localization of the G10011 plasmid insertion site. The plasmid insertion was mapped to the position 602477 on the fourth chromosome (genome release 3.0). The insertion site is located in the first intron of the predicted gene *TC008169* (magenta arrowhead). We found no

experimental evidence for the expression of the first *TC008169* exon suggesting that the plasmid insertion site is inter- rather than intragenic. *TC008169* encodes an EF1 hand protein. (B) To determine whether the expression of G10011-GFP reflects the expression of *TC008169*, we performed RNA in situ hybridization with a *TC008169* probe (magenta) combined with a  $\alpha$ -GFP staining (green). (B''') *TC008169* expression is pan-neural in the embryonic brain while G10011-GFP is expressed only in a subset of cells (B''). We conclude that G10011-GFP is unlikely to reflect the expression of *TC008169*. The plasmid insertion site is located 18.5 kb upstream of the predicted gene *TC007335* (transcription start site 6006266, magenta arrow in (A)). (C-C'') The *TC007335* RNA in situ signal and the GFP RNA in situ signal co-localize in the embryonic brain at the developmental stages NS12 (C) and NS13 (C', C''); two different focal planes ) indicating that G10011-GFP is a faithful reporter of *TC007335* RNA expression (for additional evidence refer to Figure 6). The asterisk in (C) marks the stomodeum. The expression of *TC007335* RNA in the stomodeum is very low as compared to the expression of GFP-RNA. Scale bars: (B-B'') 50  $\mu$ m; (C-C'') 20  $\mu$ m.

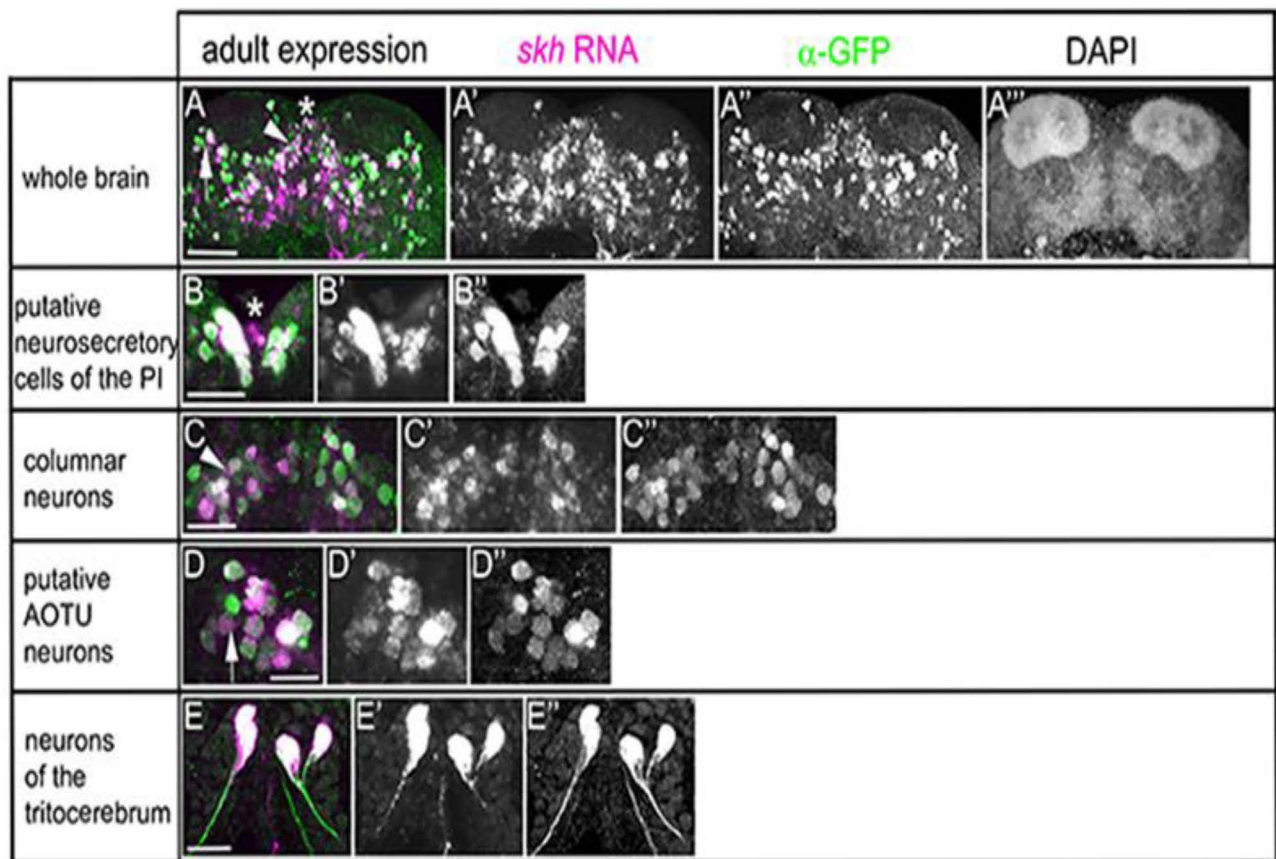

**Fig. S5. The *TC007335* RNA in situ signal and the G10011-GFP protein signal largely (and possibly) wholly co-localize in the adult brain.** (A) asterix: putative neurosecretory cells of the PI; arrowhead: columnar neurons; arrow: putative AOTU neurons. (A') *skh*-RNA. (A'') G10011-GFP protein. (A''') DAPI staining indicates all nuclei. (B-B'') putative neurosecretory cells of the PI. (B') *skh*-RNA. (B'') G10011-GFP protein. (C-C'') Columnar neurons. (C') *skh*-RNA. (C'') G10011-GFP protein. (D-D'') putative AOTU neurons. (D') *skh*-RNA. (D'') G10011-GFP protein. (E- E'') neurons of the tritocerebrum. (E') *skh*-RNA. (E'') G10011-GFP protein. The *skh*-RNA and GFP protein signals colocalize in all panels (B-E''). Scale bars: (A-A''') 50  $\mu$ m; (B-E'') 20  $\mu$ m.

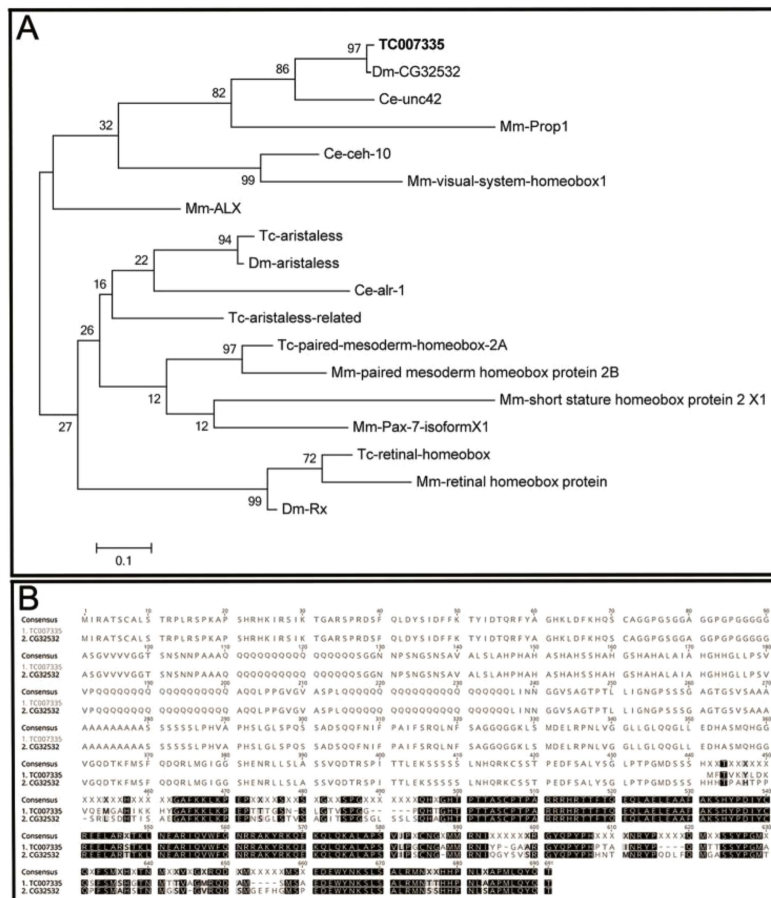

**Fig. S6. Phylogenetic tree.** (A) Phylogenetic tree reveals *D. melanogaster* CG32532, *C. elegans* unc42 and *M. musculus* Prop1 as single orthologs of TC007335. The TC007335 protein sequence was used to search the NCBI Ref-Seq databases for these species for the most similar proteins using blastp. Alignment was done using the Muscle algorithm as implemented in MEGA 6. The alignment was trimmed to remove all sequences with unclear alignment or gaps. We used Maximum Likelihood, UPGMA and neighbor joining algorithms as implemented in MEGA 6 with bootstrapping based on 500 replications to construct the phylogenetic tree. With all algorithms, the same orthology group is found (shown is the maximum likelihood tree with bootstrap values based on 500 replicates). (B) Protein sequence comparison of *Tc*-Skh and *Dm*-Skh. *Tc*-Skh (229aa) is considerably smaller than the largest predicted *Dm*-Skh isoform (RB-D) (691aa).



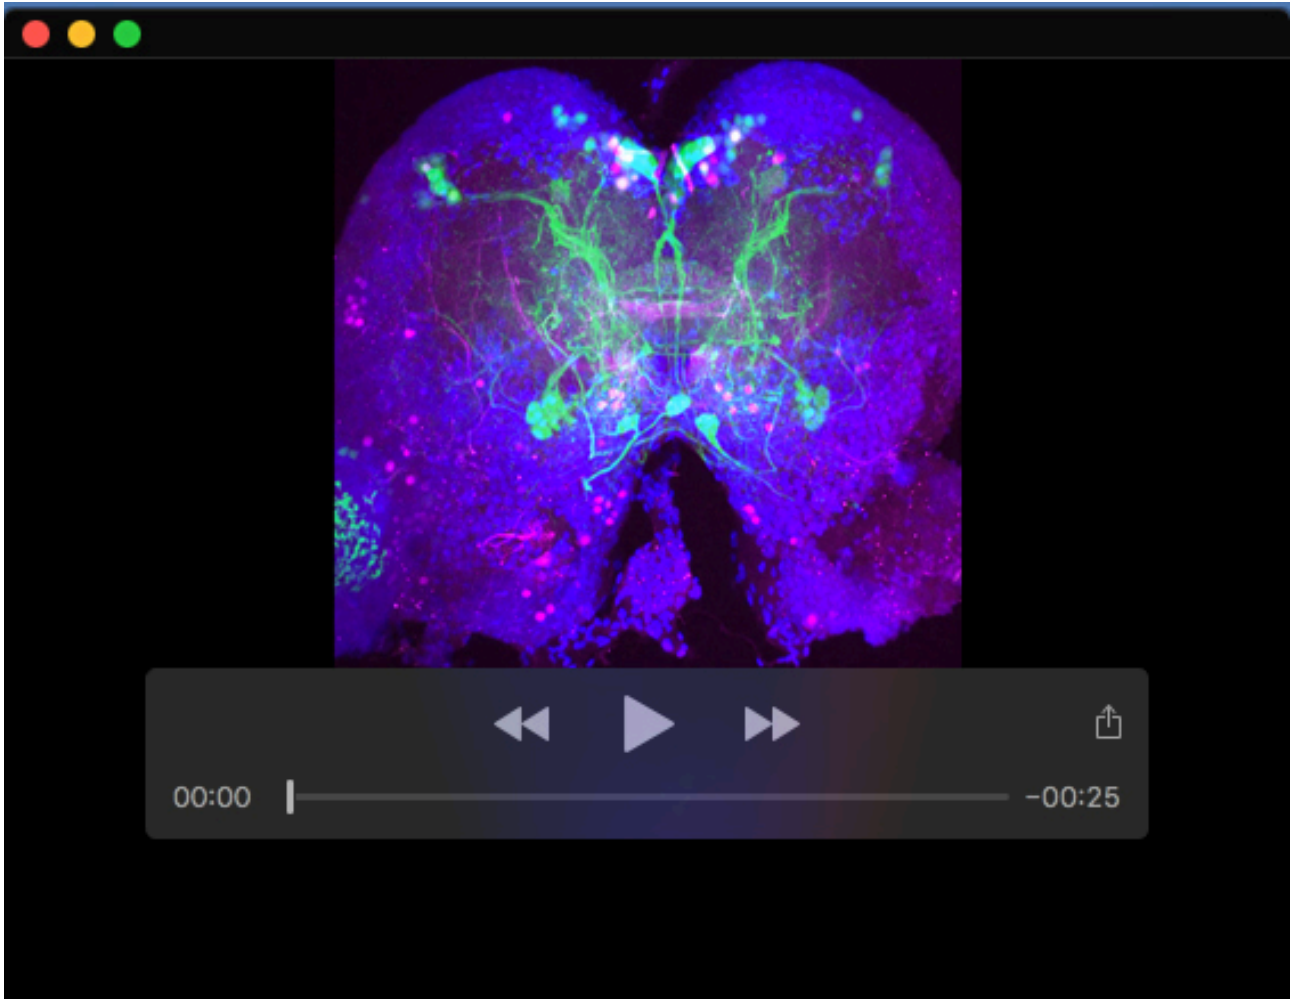

**Movie 1. G10011-GFP;5'rx-RFP adult brain**

**Table S1. Key resources**

| Reagent type (species) or resource                 | Designation                                 | Source or reference                 | Identifiers     | Additional information                                     |
|----------------------------------------------------|---------------------------------------------|-------------------------------------|-----------------|------------------------------------------------------------|
| Genetic reagent ( <i>Tribolium castaneum</i> )     | San Bernadino                               |                                     | SB              | Wild type                                                  |
| Genetic reagent ( <i>Tribolium castaneum</i> )     | 5'- <i>rx</i> -RFP                          | He et al., 2019                     |                 | RFP-expression under control of <i>rx</i> -upstream region |
| Genetic reagent ( <i>Tribolium castaneum</i> )     | Ten-a-Δ-RFP                                 | He et al., 2019<br>This study       |                 | RFP-expression in MB under the control of <i>Ten-a</i>     |
| Genetic reagent ( <i>Tribolium castaneum</i> )     | G10011-GFP                                  | This study                          |                 | GFP-expression under the control of <i>skh</i>             |
| Genetic reagent ( <i>Drosophila melanogaster</i> ) | Oregon R                                    | Bloomington Drosophila Stock Center | RRID:BDSC.5     | Wild type                                                  |
| Antibody                                           | anti-GFP (chicken, polyclonal)              | Abcam                               | RRID:AB_300798  | IF (1:1000)                                                |
| Antibody                                           | anti-PH3 (rabbit, polyclonal)               | Upstate                             | RRID:AB_310177  | IF (1:100)                                                 |
| Antibody                                           | anti-Repo (rabbit, polyclonal)              | von Hilchen et al., 2013            |                 | IF (1:1000)                                                |
| Antibody                                           | anti-Rx (guinea pig, polyclonal)            | Farnworth et al., 2020              |                 | IF (1:700)                                                 |
| Antibody                                           | anti-Synapsin (mouse, monoclonal)           | DSHB                                | RRID:AB_528479  | IF (1:50)                                                  |
| Antibody                                           | anti-acetylated Tubulin (mouse, monoclonal) | Sigma                               | RRID:AB_609894  | IF (1:50)                                                  |
| Antibody, secondary                                | Goat anti-chicken Alexa Fluor 488           | ThermoFisher                        | RRID:AB_2534096 | IF (1:1000)                                                |
| Antibody, secondary                                | Goat anti-rabbit Alexa Fluor 555            | ThermoFisher                        | RRID:AB_2535851 | IF (1:1000)                                                |
| Antibody, secondary                                | Goat anti-mouse Alexa Fluor 555             | ThermoFisher                        | RRID:AB_2535846 | IF (1:1000)                                                |
| Antibody, secondary                                | Goat anti-guinea pig Alexa Fluor 555        | ThermoFisher                        | RRID:AB_2534117 | IF (1:1000)                                                |

**Genetic reagents used in each experiment*****Tribolium castaneum* genotypes**

|                                |                              |
|--------------------------------|------------------------------|
| G10011-GFP;Ten-a $\Delta$ -RFP | Fig. 1A-D, Fig. 2L,M         |
| G10011-GFP;5' - <i>rx</i> RFP  | Fig. 2I-J''                  |
| <i>San Bernadino</i>           | Fig. S2                      |
| G10011-GFP                     | all other Figs except Fig. 9 |

***Drosophila melanogaster* line**

|                 |        |
|-----------------|--------|
| <i>Oregon R</i> | Fig. 9 |
|-----------------|--------|

**Sequence-based reagents**

| Name                              | Sequence                                                                                     |
|-----------------------------------|----------------------------------------------------------------------------------------------|
| TC007335 RNA <i>in situ</i> probe | Forward primer: CTGTGAAGTATTTGGACAAAGTACAAG<br>Reverse primer: GGATGATGCGTTGTGTTTCATCCTTAGG  |
| TC007335 dsRNA fragment1          | Forward primer: GCTGAAACCGGAGCCAACGACGACGGGCAG<br>Reverse primer: CTTGCTTTCGGTACTTGGCTCTTCGC |
| TC007335 dsRNA fragment2          | Forward primer: CTGCAACGGCGCCATGATGCGT<br>Reverse primer: GGATGATGCGTTGTGTTTCATCCTTAGG       |
| CG32532 RNA <i>in situ</i> probe  | Forward primer: CACCAACAGATGCTCACACGCAGG<br>Reverse primer: GGGAGCCGCTGCAGCAACTATGGC         |
